# Supplementary material
Source: publisher figshare collection journal article supplement (https://sage.figshare.com/ndownloader/files/23391830)
Supplement: Supplementary file 1 [file 23391830]

## Semi-structured schedule for in-depth interviews

This semi-structured schedule intends to serve as a guide that outlines **key questions**, and **probes** that will be used to collect information from study participants. (Probes will be used selectively based on participants responses).

---

### Opening

- [Begin by establishing rapport, shaking hands, etc.]
- **Introductions:** My name is Myron Godinho, and I am a PhD Student at UNSW. My supervisors are Drs. Siaw-Teng Liaw, Md. Mahfuz Ashraf and Padmanesan Narasimhan. For my PhD Research, I am researching the role of Digital Health, Social Enterprise and Citizen Engagement in the creation of Integrated People-Centred Health Services (IPCHS).
- **Purpose:** I would like to have a conversation with you about the Community Health Alliance that you manage, specifically with regards to the role of Digital Health, Social Enterprise and Citizen Engagement.
- **Motivation:** I will use this information to develop a case study of how the Community Health Alliance utilises Digital Health, Social Enterprise and Citizen Engagement to deliver Integrated People-Centred Health Services
- **Timeline:** This interview should take around 45 minutes to an hour, and I anticipate that further interviews of a similar duration will be required in the future, for the development of this case study. Is this alright with you?
- **Transition:** Please feel free to ask any questions at any time, or provide any information that you feel may be of relevance.

### Body

- Please outline the mission & history of the CHA; when you got involved; and current, past and future CHA activities
- Which activities involve digital technologies and citizen engagement? What role do these activities play in:
  - o Coordinating health and care service delivery,
  - o Improving access for the uninsured and underinsured
  - o Implementing population-based strategies to improve the quality and efficiency of medical practice
  - o Using clinical practice to identify public health issues
  - o Implementing community-based health promotion and disease preventions efforts
  - o Improving the system of care through policy development, workforce training and research activities.

### Digital Health

Digital Health is the use of any digital information and communications technology (ICT) to address health needs. It also includes e-health, m-health, health informatics and emerging computing sciences, such as 'big data', genomics and artificial intelligence.

**How is information & communication technology used to enable/facilitate CHA activities? (Key question) Probes:**

- Which digital interventions are involved? Referral systems, telemedicine, decision support systems, etc.
- From where/whom was the software procured, installed and operated?
- Could you outline the how data is generated and utilised for each of the interventions? (draft diagram with the participant)
- What are the outcomes produced by the program and how are they being monitored & evaluated?
- How does the use of digital technology enable this? What are the barriers & facilitators/enablers?
- Are any reports, protocols or guiding documents that you use to perform these functions?
- Are there any plans for future digital initiatives as part of the CHA activities?

**How does the context/ecosystem affect implementation of digital interventions in the CHA? (Key question) Probes:**

- Availability of trained human resources for managing the system? Is any training provided?
- Does the IT system communicate with the LHD's information system (HMIS)? (interoperability & standards)
- Access to infrastructure; network & connectivity issues; challenges to optimal functioning?
- Digital health in Primary & Social care: Use of MyHealthRecord and its effect on CHA operations?
- Existing e-governance approaches in health – how do these help engagement in CHA activities?
- Any comments on Community readiness for digital technology? What have you learned from feedback?

### Social Enterprise

A Social Enterprise is a dual-purpose business entity that uses a market-based approach, and innovation to fulfil a specific social and/or environmental mission while remaining financially sustainable. As a result, it can choose to reinvest surpluses into the business or community to generate **social value**, rather than maximizing profit for shareholders/owners. We think that the CHA is a good example of a social enterprise in integrated care.

**How does the social enterprise ensure that it addresses social needs? (Key question) Probes:**

- Why and how was the CHA enterprise started? What purpose did it aim to fulfil? Has this evolved over time?
- How was startup funding procured? What factors were involved in the start-up process? What lessons were learned?
- Could you describe the business model of the CHA? What is the value proposition it offers?
- How do you measure and report the social value created? Have you explored the use of different measures?
- Are there any guiding documents that you use? Do you have any documentation illustrating how this operates?

- What are the revenue streams? How are revenues reinvested for social value? Does this challenge financial sustainability?
- Are there innovative measures taken to lower the cost of services for the socioeconomically disadvantaged?
- Is the CHA provided with any tax incentives in consideration of the social value that it generates?

#### Context

- Involvement with social traders, social ventures, or other social enterprise bodies in Australia?
- Are local community members prioritised when hiring; or local businesses prioritised when sources good/services?
- Any consultant services required for CHA operation, organisational management?
- Are there any legal/regulatory frameworks used by the CHA? Have any health sector policies impacted CHA operations?
- How is the community readiness and receptiveness to CHA activities?

### Citizen Engagement

Citizen engagement is the direct involvement of citizens in the processes of local governance; including their participation in the co-creation of services, including in needs assessment, decision-making, service design, implementation and evaluation.

#### What role does Citizen Engagement play in the activities of the CHA? *Probes:*

- Which stakeholders are involved in the CHA? (general public, local community, patients, caregivers, policymakers, etc.)
- In which CHA processes are each of these stakeholder (groups) involved? How does the CHA facilitate involvement?
- How would you describe the CHA-community relationship? What elements underlie this mutual understanding? (Outline: shared mission and values, interlocutors/intermediators, CHA enabling actions, community enabling actions, capacity development for engagement. Use of information campaigns, service centres, social media, budget literacy, etc.)
- Are the citizens/community involved in the monitoring & evaluation of the CHA? (score/report card, surveys, etc?)
- What are the outcomes/impacts of involving the community in this way? Facilitators & barriers?
- Are there any guides/protocols that you use? Do you have any documentation illustrating how these processes operate?

#### What is the importance of local context in enabling citizen engagement to be effective? Factors involved? (Key question)

##### *Probes:*

- How are partnerships with community organisations established and maintained? How to ensure sustainability?
- How are partnerships measured, and what tools are used? How are the relationships formalised?
- What are some of the challenges, successes and failures that have been experienced? What lessons were learned?

### IPCHS

The WHO Framework on Integrated People-Centred Health Services consists of 5 strategies described here. Looking at these strategies and sub-strategies, do they seem straightforward? Do you have any questions regarding these?

- **Based on our discussions today, which of these do you think the CHA accomplishes?**
- **How do digital technology, business innovation and citizen engagement accomplish these?**
- **Exactly which CHA activities, structures, and processes are involved in accomplishing these?**
- **What are the key contextual factors required for integrated care delivery or care integration? *Probes:***
  - o What types of external support/partnerships play an important role in CHA function?
  - o What are the legal and regulatory frameworks, governance and infrastructure upon which the CHA relies?
  - o What are the roles of actors (Individual, community, PHN, LHD, local council, policymakers) in CHA function?

### Case comparisons

- What are some of the differences you observed when comparing the experience in Fairfield to that of Wollondilly?
- Difference in CHA objectives? Differences in outcomes? What can these differences in outcomes be attributed to?
- Differences with respect to: (1) digital technology, (2) business innovation, and (3) citizen engagement.
- How do the differences in these 3 areas translate into differences in outcomes?

### Closing

- **Summary:** So to summarise, the activities of the CHA are...  
The role of Digital Health is... The role of Social Enterprise is... The role of Citizen Engagement is...
- **Maintain Rapport:** I appreciate you taking the time for this interview. Is there anything else that you feel would be helpful for me to know?
- **Could you help us establish contact with CHA stakeholder groups and representatives of partner organisations for conducting further interviews on similar issue that we have discussed today?**
- **Actions to be taken:**
  - o Documents / archival records / materials to be provided:
  - o I think I have all the information I need for now. Would it be alright to contact you with any additional questions?
  - o After compiling this case study, would it be alright for you to review it to validate my findings and conclusions?

- I will be in touch regarding the development of this case study. Once again, thank you very much for your time.
